# Supplementary material
Source: PubMed Central journal article supplement (PMC2868178)

**Supplementary information Figure 1. *Expression of the splice variants ENH3 in diseased heart of mice.***

ENH splice-variant expression was examined in mouse heart after trans-aortic constriction (TAC) leading to cardiac hypertrophy and heart failure. ENH3 during the development of cardiac hypertrophy 1 week after TAC or sham operation (left) or in mice prone to heart failure 8 weeks after TAC or sham operation (right). ENH splice-variants were quantified by real-time PCR using 50 ng of total RNA. ENH3 splice-variant was quantified by real-time PCR using 50 ng of total RNA. Shown are means and S.D. of 3 independent experiments from 3 mouse hearts for each experimental condition; \* significantly different from sham operated control ( $p < 0.02$ ).

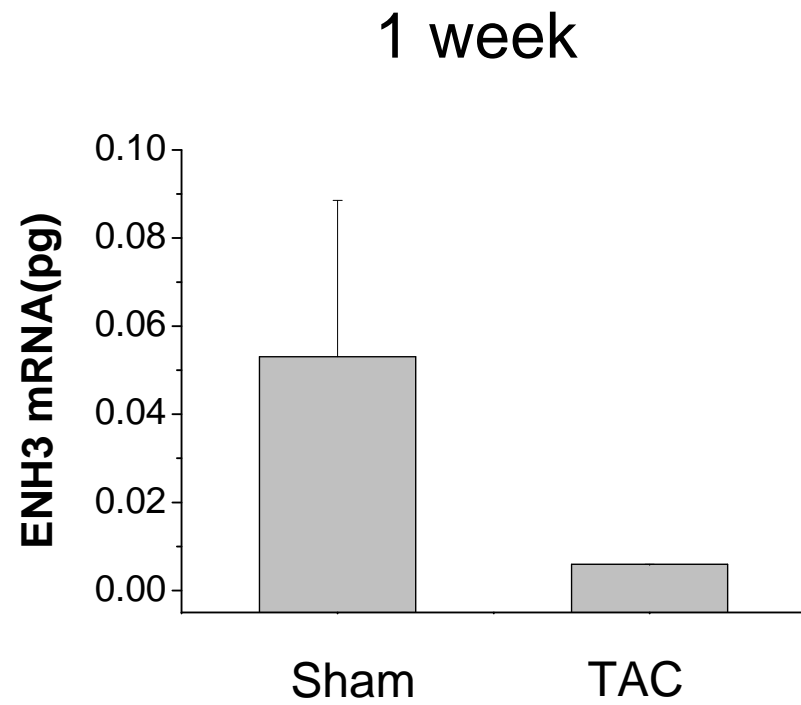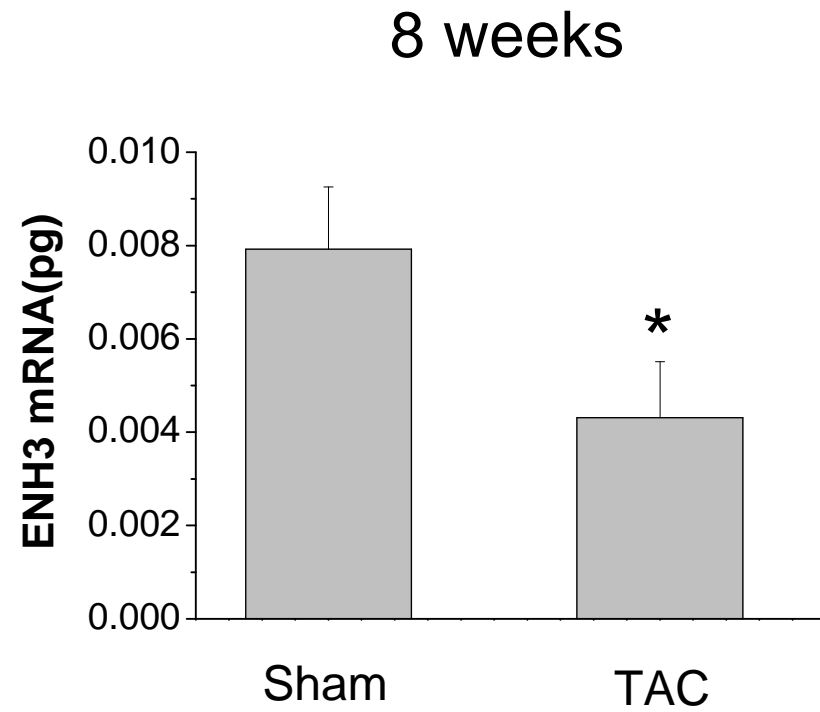

Supplement: supp_cvq023_cvq023supp.pdf [file supp_cvq023_cvq023supp.pdf]
